# Supplementary figures and images for: Parthenolide generates reactive oxygen species and autophagy in MDA-MB231 cells. A soluble parthenolide analogue inhibits tumour growth and metastasis in a xenograft model of breast cancer
Source: PubMed Central journal article supplement — Cell Death Dis. 2013 Oct 31;4(10):e891–. doi: 10.1038/cddis.2013.415 (PMC3920954; doi:10.1038/cddis.2013.415), 2013-10-31

## Supplementary Figure S1

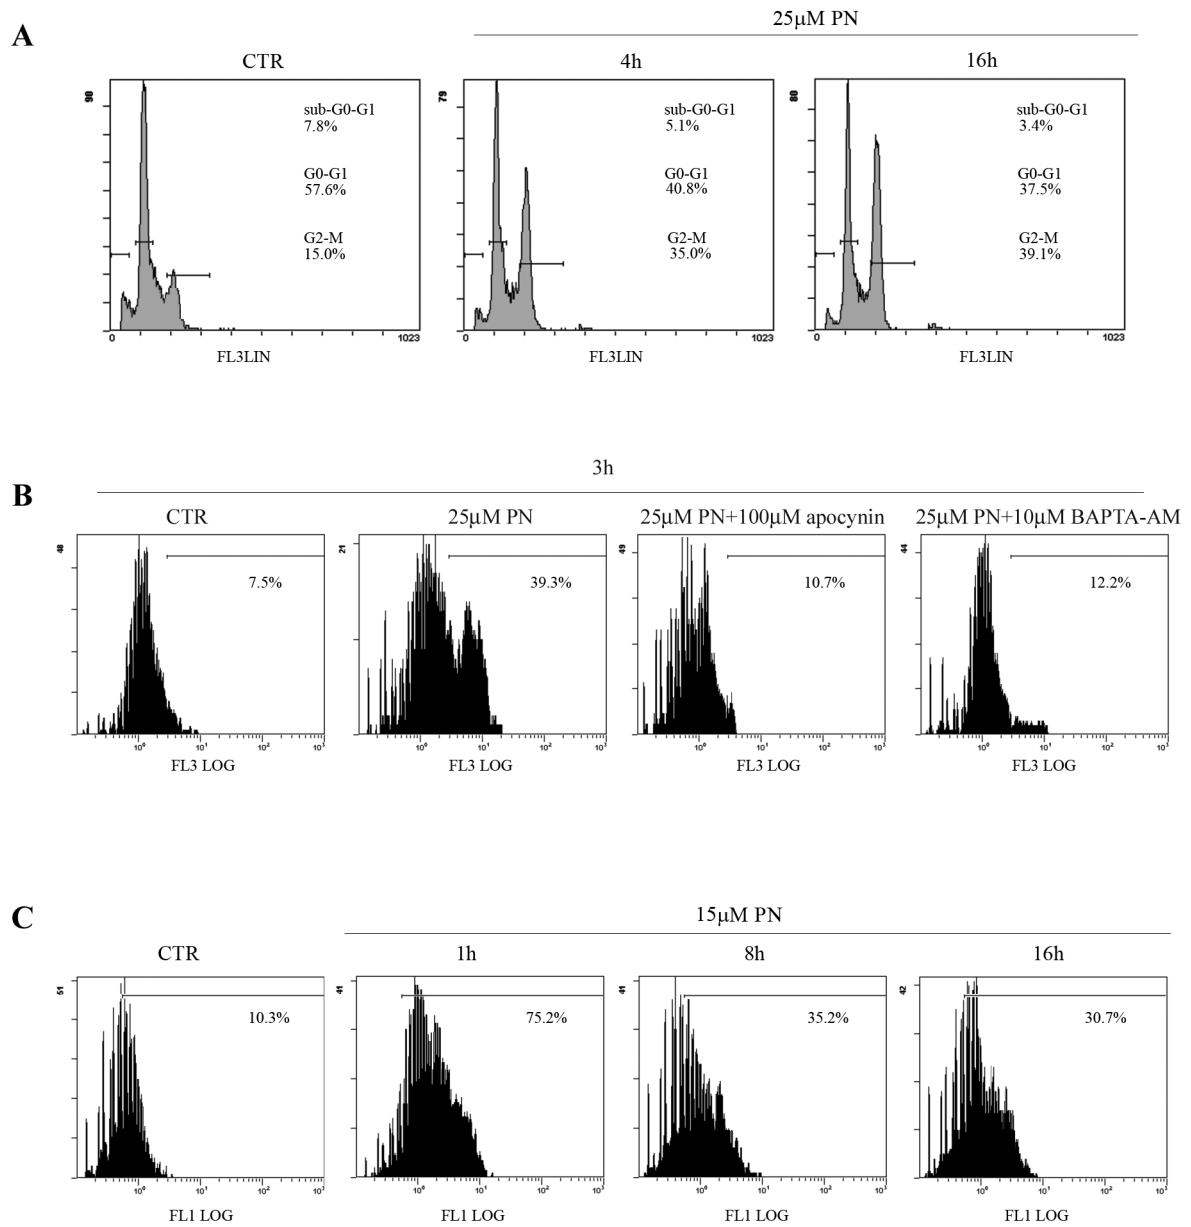

## Supplementary Figure S2

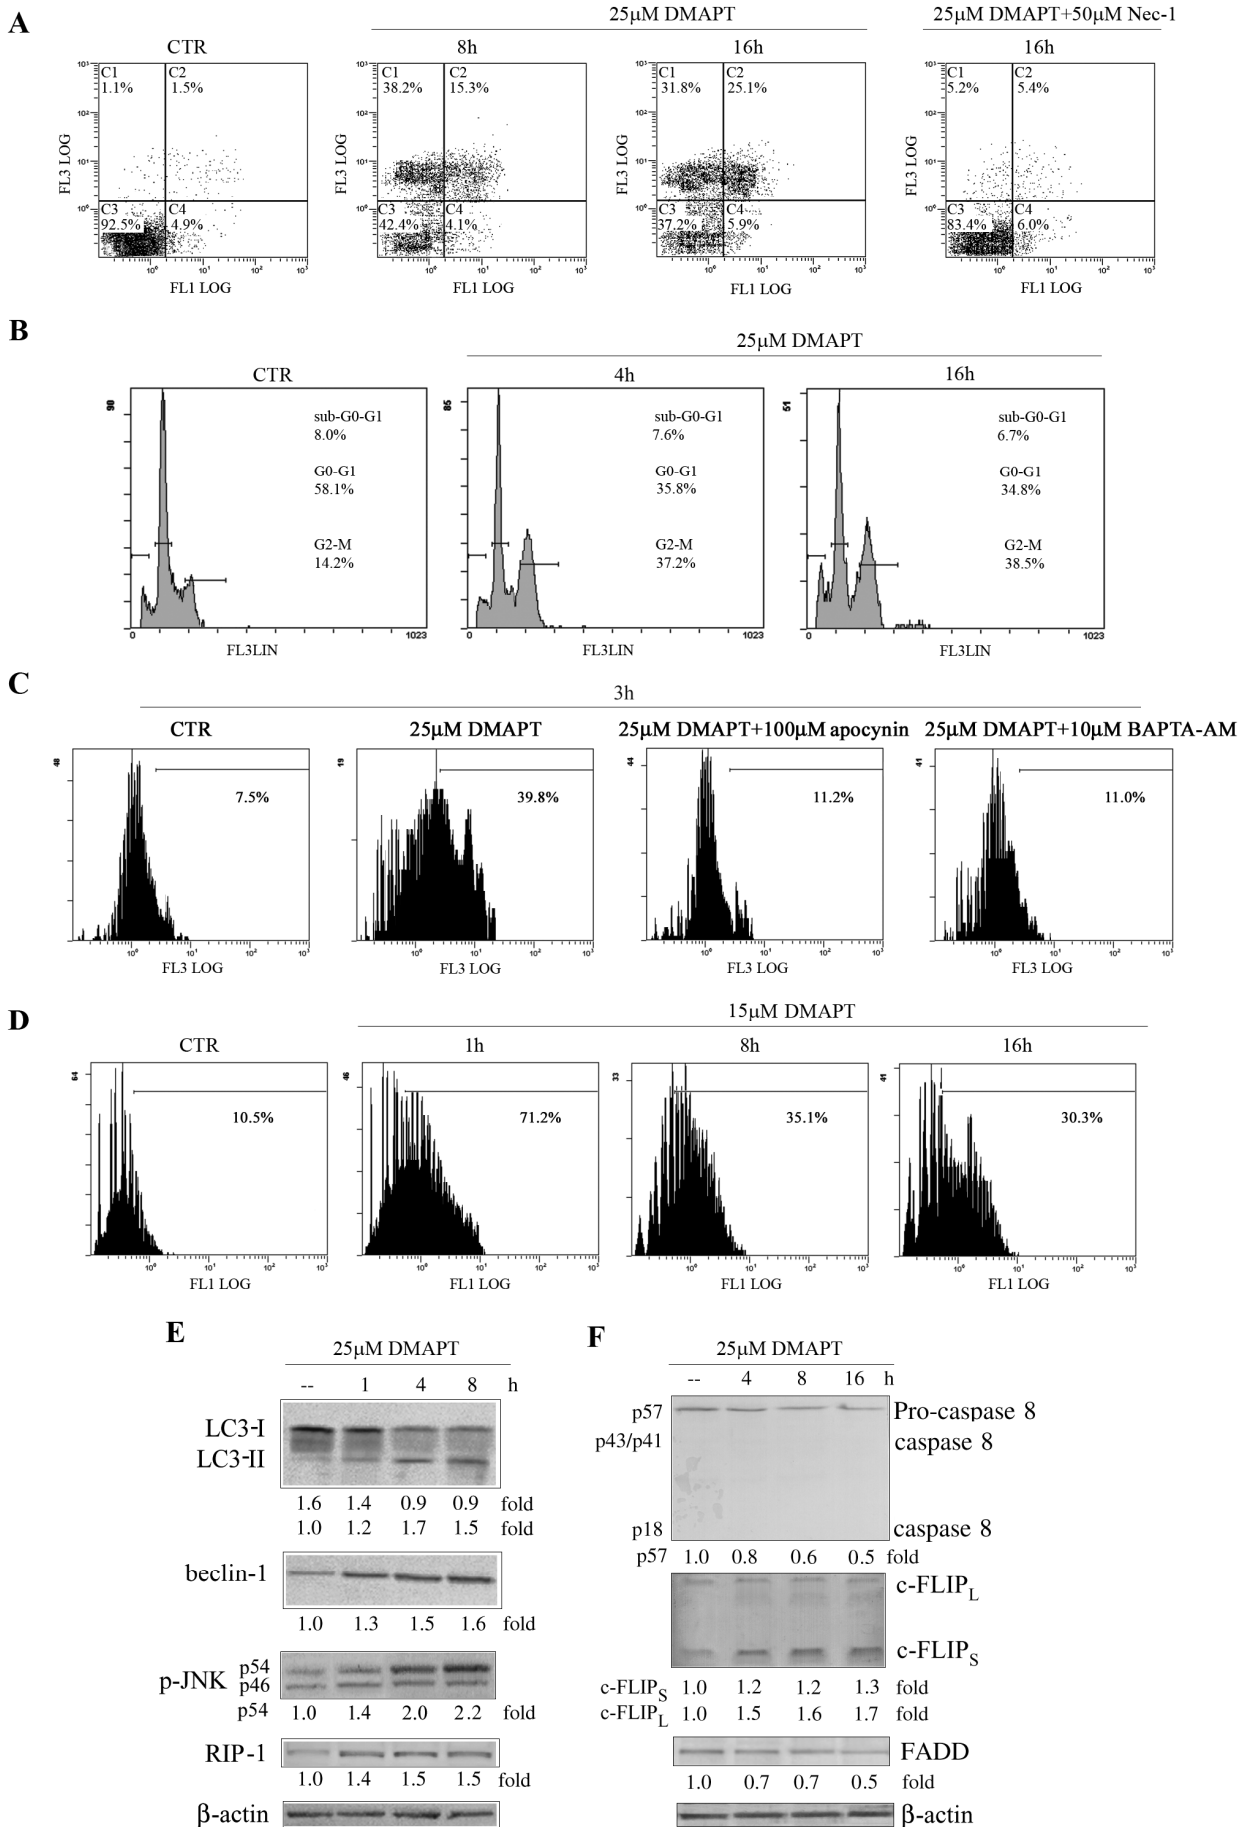

Supplement: cddis2013415x1.pdf [file cddis2013415x1.pdf]
